# Supplementary material for: Clínica Universidad de Navarra Body Adiposity Estimator and Risk of Incident Metabolic Dysfunction–Associated Steatotic Liver Disease in Non‑Obese Chinese Adults: A Prospective Cohort Study with the Triglyceride–Glucose Index as a Partial Mediator
Source: Research Square preprint supplement (doi:10.21203/rs.3.rs-7751064/v1), 2025-10-17
Supplement: Supplementary file 1 [file a223c4c7d00f434ada3e4139.docx]

**Supplementary Table 1.Sensitivity analysis before interpolation**

| **Exposure** | **MASLD, HR (95%CI)** | | | | |
| --- | --- | --- | --- | --- | --- |
| **Crude model** | **model 1** | **model 2** | **Model 3** | **Model 4** |
| **CUN-BAE z-score** | **1.51 (1.45, 1.57) <0.0001** | **1.42 (1.36, 1.49) <0.0001** | **1.42 (1.35, 1.48) <0.0001** | **1.38 (1.32, 1.45) <0.0001** | **1.34 (1.27, 1.40) <0.0001** |
| **CUN-BAE z-score quartile** | | | | | |  |  |
| **Low** | **1.0** | **1.0** | **1.0** | **1.0** | **1.0** |
| **Middle** | **1.94 (1.73, 2.17) <0.0001** | **2.04 (1.80, 2.32) <0.0001** | **2.07 (1.82, 2.35) <0.0001** | **2.08 (1.83, 2.37) <0.0001** | **1.89 (1.66, 2.15) <0.0001** |
| **High** | **2.30 (2.06, 2.57) <0.0001** | **2.17 (1.91, 2.46) <0.0001** | **2.18 (1.93, 2.47) <0.0001** | **2.13 (1.87, 2.42) <0.0001** | **1.96 (1.72, 2.22) <0.0001** |
| **P for trend** | **<0.001** | **<0.001** | **<0.001** | **<0.001** | **<0.001** |

**Crude model adjusted for none;
model 1 adjusted for: ALT; AST; TP; ALB; GLB**

**model 2 adjusted for: ALT; AST; TP; ALB; GLB; BUN; CR; UA**

**model 3 adjusted for: ALT; AST; TP; ALB; GLB; BUN; CR; UA; TC; TG; HDL-C; LDL-C
model 4 adjusted for: ALT; AST; TP; ALB; GLB; BUN; CR; UA; TC; TG; HDL; LDL-C; FBG; SBP; DBP**
