# Supplementary material for: Clínica Universidad de Navarra Body Adiposity Estimator and Risk of Incident Metabolic Dysfunction–Associated Steatotic Liver Disease in Non‑Obese Chinese Adults: A Prospective Cohort Study with the Triglyceride–Glucose Index as a Partial Mediator
Source: Research Square preprint supplement (doi:10.21203/rs.3.rs-7751064/v1), 2025-10-17
Supplement: Supplementary file 2 [file d7a3f883cff30b291e6731d8.docx]

**Supplementary Table 2. Threshold effect analysis.**

**For exposure: CUN-BAE**

| **Outcome:** | **MASLD** | **MASLD（Female）** | **MASLD（Male）** |
| --- | --- | --- | --- |
| **Model I** |  |  |  |
| **One-line effect** | **1.0 (1.0, 1.1) <0.001** | **1.2 (1.2, 1.2) <0.001** | **1.2 (1.2, 1.2) <0.001** |
| **Model II** |  |  |  |
| **Breakpoint (K)** | **18.8** | **31.2** | **18.7** |
| **Effect 1 (< K segment)** | **1.5 (1.4, 1.5) <0.001** | **1.5 (1.4, 1.6) <0.001** | **1.5 (1.4, 1.6) <0.001** |
| **Effect 2 (> K segment)** | **1.0 (1.0, 1.0) <0.001** | **1.1 (1.0, 1.1) <0.001** | **1.1 (1.1, 1.1) <0.001** |
| **Difference between Effect 2 and 1** | **0.7 (0.7, 0.8) <0.001** | **0.7 (0.7, 0.8) <0.001** | **0.8 (0.7, 0.8) <0.001** |
| **Log-likelihood ratio test** | **<0.001** | **<0.001** | **<0.001** |

**Outcome variable: MASLD**

**Exposure variable: CUN-BAE**

**Adjusted variables: ALT; AST; TP; ALB; GLB; BUN; CR; UA; TC; TG; HDL; LDL-C; FBG; SBP; DBP**
